# Supplementary material
Source: PubMed Central journal article supplement (PMC3232627)
Supplement: supp_jc.2011-2149_11-2149_supplemental_data.pdf [file supp_jc.2011-2149_11-2149_supplemental_data.pdf]

1 **Supplemental Data**

2

3 **Prolactin levels – at baseline and post-CRH stimulation**

4 Baseline peripheral prolactin levels were normal in all occult and EAS patients. Four  
5 patients with Cushing’s disease had mildly elevated baseline peripheral prolactin levels of 31.9–  
6 45.9 ng/ml (1.4–2.0 nmol/liter), normal < 20 ng/ml (< 0.9 nmol/liter) with no significant change  
7 after CRH. Prolactin immunostaining was not performed on resected tissues. Baseline IPS  
8 prolactin levels on the dominant side were 11.1-498.6 ng/ml (0.5-21.7 pmol/liter) in patients with  
9 Cushing’s disease and 4.2-56.2 ng/ml (0.2-2.4 pmol/liter) in EAS. Baseline IPS prolactin levels  
10 were higher on the side of the tumor in 9 (inter-petrosal prolactin gradient = 1.4-4.9), higher on  
11 the opposite side in two (inter-petrosal prolactin gradient = 1.3, 4.1) and similar on the two sides  
12 in 5 of the 17 Cushing’s disease patients. After CRH, 10 (59%) patients with Cushing’s disease  
13 had greater than 10% increase in prolactin levels while six (35%) had greater than 10% decrease  
14 on the side with the dominant ACTH IPS/P. Six EAS patients (75%) had greater than 10%  
15 increase while two (25%) had greater than 10% decrease in values on the dominant side. The  
16 change in prolactin did not parallel the change in ACTH levels post-CRH stimulation.

17 Post-CRH prolactin IPS/P ratios on the dominant side were > 1.8 in the seven EAS  
18 patients with true negative IPSS results. However, use of post-CRH prolactin values to calculate  
19 the normalized ACTH IPS/P ratios led to indeterminate results (0.6–0.7) in three cases while it  
20 was 5.3 in the false positive case (Supplemental Table 3).

21 Post-CRH prolactin IPS/P ratios in 15 true positive Cushing’s disease patients were > 1.8.  
22 One patient with true positive IPSS result and evidence of successful catheterization using  
23 baseline prolactin values had a post-CRH prolactin IPS/P ratio of 1.6; normalized ACTH/post-

24 CRH prolactin IPS/P ratio was 56.1. The Cushing's disease patient with false negative IPSS  
25 result was correctly identified using both baseline and post-CRH prolactin values (Supplemental  
26 Table 3).

27

28

29

30

31

32

33

34

35

36

37

38

39

40

41

42

43 **Supplemental Table 1:** IPSS ACTH and prolactin data pre (-5 and 0 minutes) and post-CRH stimulation  
 44 (+3, +5, and +10 minutes) in a patient with occult Cushing's syndrome (Occult 2).

| Time | ACTH (pg/ml) |          |    |             |            | Prolactin (ng/ml) |          |      |             |            |
|------|--------------|----------|----|-------------|------------|-------------------|----------|------|-------------|------------|
|      | Right IPS    | Left IPS | P  | Right IPS/P | Left IPS/P | Right IPS         | Left IPS | P    | Right IPS/P | Left IPS/P |
| -5   | 106          | 96       | 87 | 1.2         | 1.1        | 72.7              | 17.0     | 19.7 | 3.7         | 0.9        |
| 0    | 102          | 93       | 88 | 1.1         | 1.1        | 71.6              | 14.5     | 17.1 | 4.2         | 0.8        |
| 3    | 188          | 89       | 82 | 2.3         | 1.1        | 90.9              | 16.1     | 15.0 | 6.1         | 1.1        |
| 5    | 139          | 82       | 85 | 1.7         | 1.0        | 82.6              | 14.4     | 16.6 | 5.0         | 0.9        |
| 10   | 138          | 88       | 81 | 1.7         | 1.1        | 52.0              | 15.1     | 14.2 | 3.7         | 1.1        |

45 IPS = inferior petrosal sinus, IPS/P = inferior petrosal sinus to peripheral ratio, P = peripheral. To convert  
 46 ACTH level to pmol/liter, multiply by 0.2202. To convert prolactin levels to nmol/liter, multiply by  
 47 0.04348; prolactin levels in ng/ml are equivalent to mcg/liter.

48  
 49  
 50  
 51  
 52  
 53  
 54  
 55  
 56  
 57  
 58

59 **Supplemental Table 2:** IPSS venogram results and baseline prolactin IPS/P ratios in patients with  
60 ACTH-dependent Cushing's syndrome (patients with normal venous anatomy and baseline prolactin  
61 IPS/P > 1.8 {n = 14} are not shown in the table)

| <b>Anomalous IPSS venous anatomy/drainage</b> |                    |                           |                                                                                                                                                                                                                                               |
|-----------------------------------------------|--------------------|---------------------------|-----------------------------------------------------------------------------------------------------------------------------------------------------------------------------------------------------------------------------------------------|
| <b>Baseline PRL IPS/P ≤ 1.8</b>               |                    |                           |                                                                                                                                                                                                                                               |
| <b>Type</b>                                   | <b>IPSS result</b> | <b>Baseline PRL IPS/P</b> | <b>Venogram</b>                                                                                                                                                                                                                               |
| Occult 4                                      | -                  | 1.6                       | Large right and small left petrosal vein                                                                                                                                                                                                      |
| Occult 3                                      | -                  | 1.2                       | Small left petrosal vein                                                                                                                                                                                                                      |
| CD                                            | FN                 | 1.0                       | Large left and somewhat smaller right petrosal vein, catheter could not be progressed fully into the right petrosal vein                                                                                                                      |
| <b>Baseline PRL IPS/P &gt; 1.8</b>            |                    |                           |                                                                                                                                                                                                                                               |
| <b>Type</b>                                   | <b>IPSS result</b> | <b>Baseline PRL IPS/P</b> | <b>Venogram</b>                                                                                                                                                                                                                               |
| CD                                            | TP                 | 6.2                       | Large left and small right petrosal vein                                                                                                                                                                                                      |
| CD                                            | TP                 | 5.7                       | Very attenuated communicating veins between cavernous sinus and inferior petrosal vein- sampling done from expected draining veins                                                                                                            |
| CD                                            | TP                 | 4.7                       | Inferior petrosal veins joined an anterior separate jugular division that then joined the main vein at the mandible, larger right and narrower left petrosal vein                                                                             |
| CD                                            | TP                 | 10.9                      | Hypoplastic, narrow left petrosal vein. Smaller catheter used                                                                                                                                                                                 |
| Ectopic                                       | TN                 | 3.9                       | Right jugular vein divided early sending a branch to draining cavernous sinus and to vertebral plexus and a second branch to base of skull draining the sigmoid and transverse sinus; left petrosal vein narrow, no difficulty in cannulation |
| CD                                            | TP                 | 2.2                       | Right inferior petrosal sinus drained into both the right jugular and right vertebral plexus, predominant drainage into the right vertebral plexus, otherwise normal                                                                          |
| Occult 2                                      | -                  | 4.2                       | Bilateral small petrosal veins - difficult to cannulate                                                                                                                                                                                       |
| CD                                            | TP                 | 2.9                       | Generous right petrosal vein and narrow left petrosal vein, able to cannulate with 2.8 French catheter                                                                                                                                        |
| <b>Normal venous anatomy/drainage</b>         |                    |                           |                                                                                                                                                                                                                                               |
| <b>Baseline PRL IPS/P ≤ 1.8</b>               |                    |                           |                                                                                                                                                                                                                                               |
| <b>Type</b>                                   | <b>IPSS result</b> | <b>Baseline PRL</b>       | <b>Venogram</b>                                                                                                                                                                                                                               |

|                                          |                    |                           |                                                                                                                                                                   |
|------------------------------------------|--------------------|---------------------------|-------------------------------------------------------------------------------------------------------------------------------------------------------------------|
|                                          |                    | <b>IPS/P</b>              |                                                                                                                                                                   |
| CD                                       | TP                 | 1.1                       | Normal                                                                                                                                                            |
| Ectopic                                  | FP                 | 1.7                       | Normal                                                                                                                                                            |
| CD                                       | TP                 | 0.8                       | Normal                                                                                                                                                            |
| <b>Procedural difficulty during IPSS</b> |                    |                           |                                                                                                                                                                   |
| <b>Type</b>                              | <b>IPSS result</b> | <b>Baseline PRL IPS/P</b> | <b>Venogram</b>                                                                                                                                                   |
| CD                                       | TP                 | 3.4                       | Tortuous course of left innominate vein, left petrosal vein catheter unstable and moved out, samples delayed by 2 min due to repositioning, venous anatomy normal |

62 CD = Cushing's disease, PRL = Prolactin, IPS/P = inferior petrosal sinus to peripheral ratio, TP = true  
63 positive, TN = true negative, FP = false positive, FN = false negative

64

65

66

67

68

69

70

71

72

73

74

75

76

77

78

79

80 **Supplemental Table 3:** IPSS ACTH (pg/ml) and prolactin (ng/ml) data in 29 patients with ACTH-  
81 dependent Cushing’s syndrome with pre and post-CRH prolactin IPS/P ratios and normalized ACTH  
82 IPS/P ratios using both pre and post-CRH prolactin values.

| Type  | IPSS result | Peak ACTH IPS/P | Ipsilateral BL PRL IPS/P | Normalized Peak ACTH/BL PRL IPS/P | Ipsilateral Peak PRL IPS/P | Normalized Peak ACTH/Peak PRL IPS/P |
|-------|-------------|-----------------|--------------------------|-----------------------------------|----------------------------|-------------------------------------|
| EAS   | TN          | 1.2             | 1.8                      | 0.7                               | 2.1                        | 0.6                                 |
| EAS   | TN          | 1.5             | 3.1                      | 0.5                               | 2.3                        | 0.7                                 |
| EAS   | TN          | 1.1             | 4                        | 0.3                               | 4.5                        | 0.3                                 |
| EAS   | TN          | 1.4             | 5.4                      | 0.3                               | 9.0                        | 0.2                                 |
| EAS   | TN          | 1.1             | 4.8                      | 0.2                               | 4.3                        | 0.3                                 |
| EAS   | TN          | 1.2             | 4.7                      | 0.3                               | 9.7                        | 0.1                                 |
| EAS   | TN          | 1.4             | 3.9                      | 0.4                               | 2.1                        | 0.7                                 |
| EAS   | FP          | 9.5             | 1.7                      | 5.6                               | 1.8                        | 5.3                                 |
| CD    | TP          | 20.4            | 4.7                      | 4.3                               | 7.3                        | 2.8                                 |
| CD    | TP          | 113.4           | 10.9                     | 10.4                              | 4.9                        | 23.2                                |
| CD    | TP          | 53.6            | 5                        | 10.8                              | 5.7                        | 9.5                                 |
| CD    | TP          | 131.7           | 6.2                      | 21.4                              | 3.0                        | 43.5                                |
| CD    | TP          | 20              | 2                        | 10.1                              | 2.2                        | 9.3                                 |
| CD    | TP          | 49.2            | 5.7                      | 8.6                               | 3.8                        | 12.9                                |
| CD    | TP          | 87.5            | 2.1                      | 40.9                              | 1.6                        | 56.1                                |
| CD    | TP          | 9.7             | 0.8                      | 11.6                              | 2.5                        | 3.9                                 |
| CD    | TP          | 18.5            | 3.6                      | 5.1                               | 5.1                        | 3.6                                 |
| CD    | TP          | 167.3           | 4.7                      | 35.5                              | 30                         | 5.6                                 |
| CD    | TP          | 37.7            | 2.2                      | 16.8                              | 2.8                        | 13.3                                |
| CD    | TP          | 36.3            | 10.9                     | 3.3                               | 4.2                        | 8.7                                 |
| CD    | TP          | 9.2             | 1.1                      | 8.4                               | 1.9                        | 5.0                                 |
| CD    | TP          | 11.3            | 2.9                      | 3.9                               | 6.2                        | 1.8                                 |
| CD    | TP          | 40.9            | 3.4                      | 11.9                              | 3.4                        | 12.2                                |
| CD    | TP          | 78.2            | 3.1                      | 24.9                              | 3.9                        | 19.9                                |
| CD    | FN          | 1.3             | 1                        | 1.3                               | 1.0                        | 1.3                                 |
| Occ 1 | --          | 1.3             | 13.2                     | 0.1                               | 11.7                       | 0.1                                 |
| Occ 2 | --          | 2.3             | 4.2                      | 0.6                               | 6.1                        | 0.4                                 |
| Occ 3 | --          | 1.3             | 1.2                      | 1.1                               | 1.4                        | 1.4                                 |
| Occ 4 | --          | 1.4             | 1.6                      | 0.9                               | 0.7                        | 0.7                                 |

83
